# Supplementary material for: Small Extracellular Vesicle‐Derived vWF Induces a Positive Feedback Loop between Tumor and Endothelial Cells to Promote Angiogenesis and Metastasis in Hepatocellular Carcinoma
Source: PubMed Central journal article supplement (PMC10502836; doi:10.1002/advs.202302677), 2023-06-30
Supplement: ADVS-10-2302677-s001.pdf [file ADVS-10-2302677-s001.pdf]

## Supporting Information

for *Adv. Sci.*, DOI 10.1002/adv.202302677

Small Extracellular Vesicle-Derived vWF Induces a Positive Feedback Loop between Tumor and Endothelial Cells to Promote Angiogenesis and Metastasis in Hepatocellular Carcinoma

*Samuel Wan Ki Wong, Sze Keong Tey, Xiaowen Mao, Hiu Ling Fung, Zhi-Jie Xiao, Danny Ka Ho Wong, Lung-Yi Mak, Man-Fung Yuen, Irene Oi-Lin Ng, Jing Ping Yun, Yi Gao and Judy Wai Ping Yam\**

Supporting Information

**Small extracellular vesicle-derived vWF induces a positive feedback loop between tumour and endothelial cells to promote angiogenesis and metastasis in hepatocellular carcinoma**

*Samuel Wan Ki Wong, Sze Keong Tey, Mao Xiaowen, Hiu Ling Fung, Zhi-Jie Xiao, Danny Ka Ho Wong, Lung-Yi Mak, Man-Fung Yuen, Irene Oi-Lin Ng, Jing Ping Yun, Yi Gao, Judy Wai Ping Yam\**

## Supplementary Figures

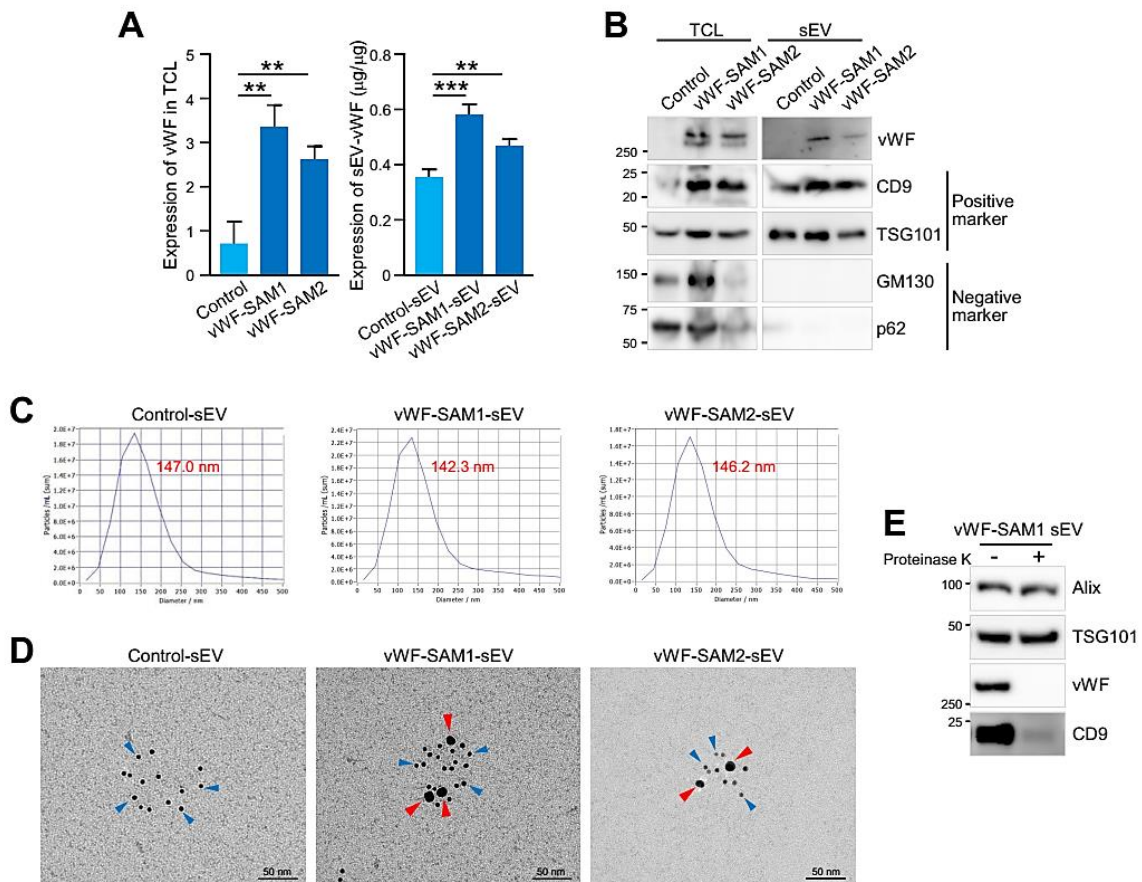

**Supplementary Figure 1. Characterisation of vWF-enriched sEV.** **A.** ELISA of vWF level in sEV collected from the conditioned medium of HLE control (Control-sEV) and vWF overexpressing (vWF-SAM1-sEV and vWF-SAM2-sEV) cells. **B.** Western blotting of vWF, positive and negative sEV markers in the total cell lysate (TCL) and isolated Control-sEV and vWF-SAM1/2-sEV of HLE cells. **C.** Size distribution of the indicated sEV measured by ZetaView® TWIN-NTA PMX-220. **D.** Representative electron micrographs of the indicated sEV co-stained by anti-CD63 and anti-vWF antibodies and secondary antibody conjugated with 5 nm and 15 nm gold particles, respectively. Red arrowhead indicates vWF and blue arrowhead indicates CD63. Scale bar, 50 nm. **E.** Western blot analysis showing expressions of Alix, TSG101, vWF and CD9 in vWF-SAM1-sEV treated with or without 1 µg/ml proteinase K. Data are presented as mean ± SEM. \*\* $P < 0.01$ ; \*\*\* $P < 0.001$ .  $P < 0.05$  is regarded as statistically significant. *NS*, not significant.

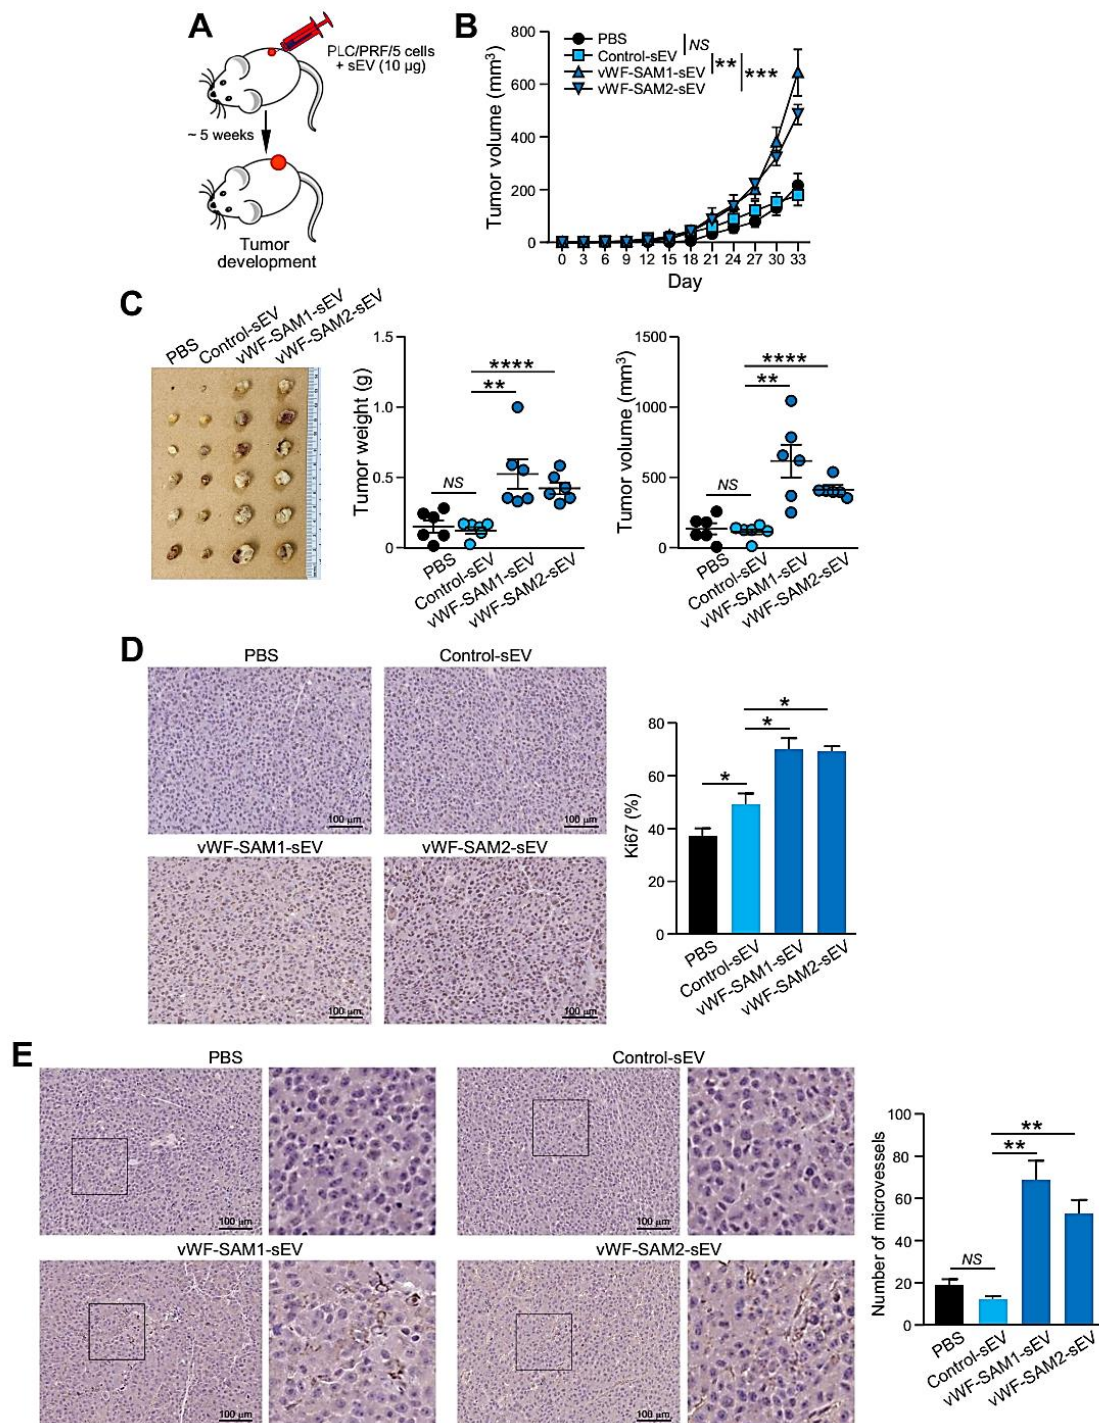

**Supplementary Figure 2. sEV-vWF promotes HCC tumourigenesis.** **A.** Schematic diagram of *in vivo* tumourigenicity model. PLC/PRF/5 cells were subcutaneously co-injected with sEVs into BALB/c-nu mice. The tumour growth was monitored for 5 weeks. Tumour growth over time (**B**), excised tumour images, weight and volume (**C**) are shown. Immunohistochemical staining of Ki67 (**D**) and CD31 (**E**) of excised tumour (n = 6). Signals of Ki67 and CD31 were quantified. Data are presented as mean  $\pm$  SEM. \* $P$  < 0.05; \*\* $P$  < 0.01; \*\*\*\* $P$  < 0.0001.  $P$  < 0.05 is regarded as statistically significant. NS, not significant.

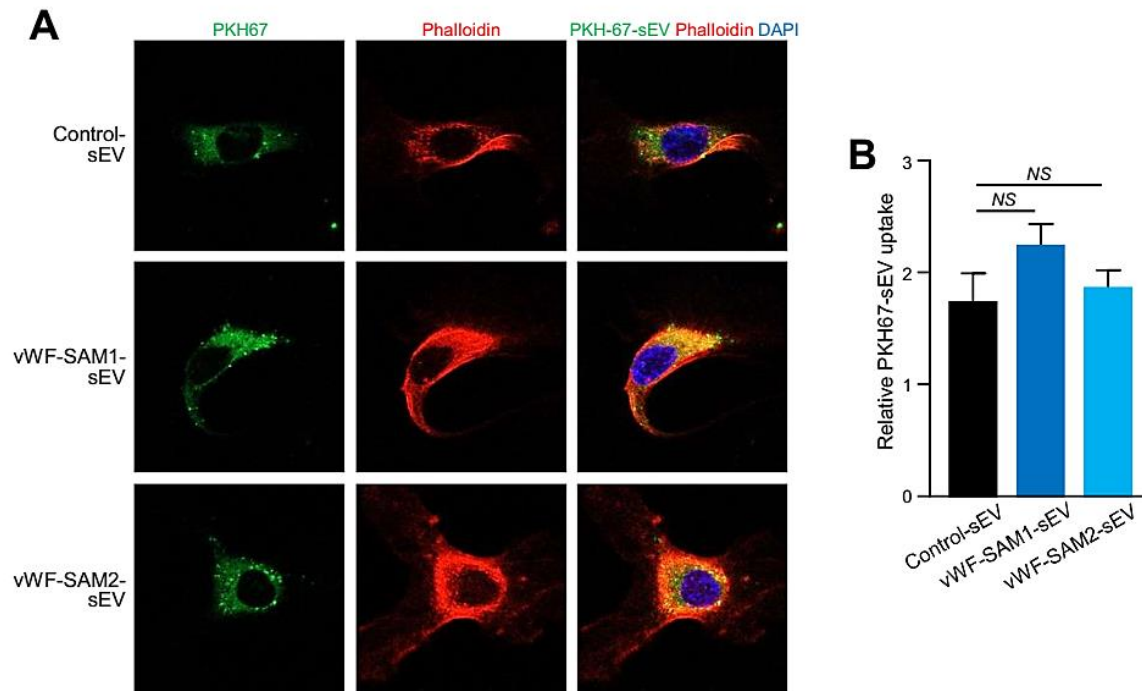

**Supplementary Figure 3. Uptake of sEV by endothelial cells.** **A.** HUVECs were incubated with PKH67-labeled sEVs collected from the conditioned medium of HLE control (Control-sEV) and vWF overexpressing (vWF-SAM1-sEV and vWF-SAM2-sEV) cells. After incubation, cells were stained by phalloidin and DAPI. Scale bar: 20  $\mu$ m. Representative images are shown. **B.** Data are expressed as arbitrary units and are presented relative to the value obtained for cells treated with Control-sEV.

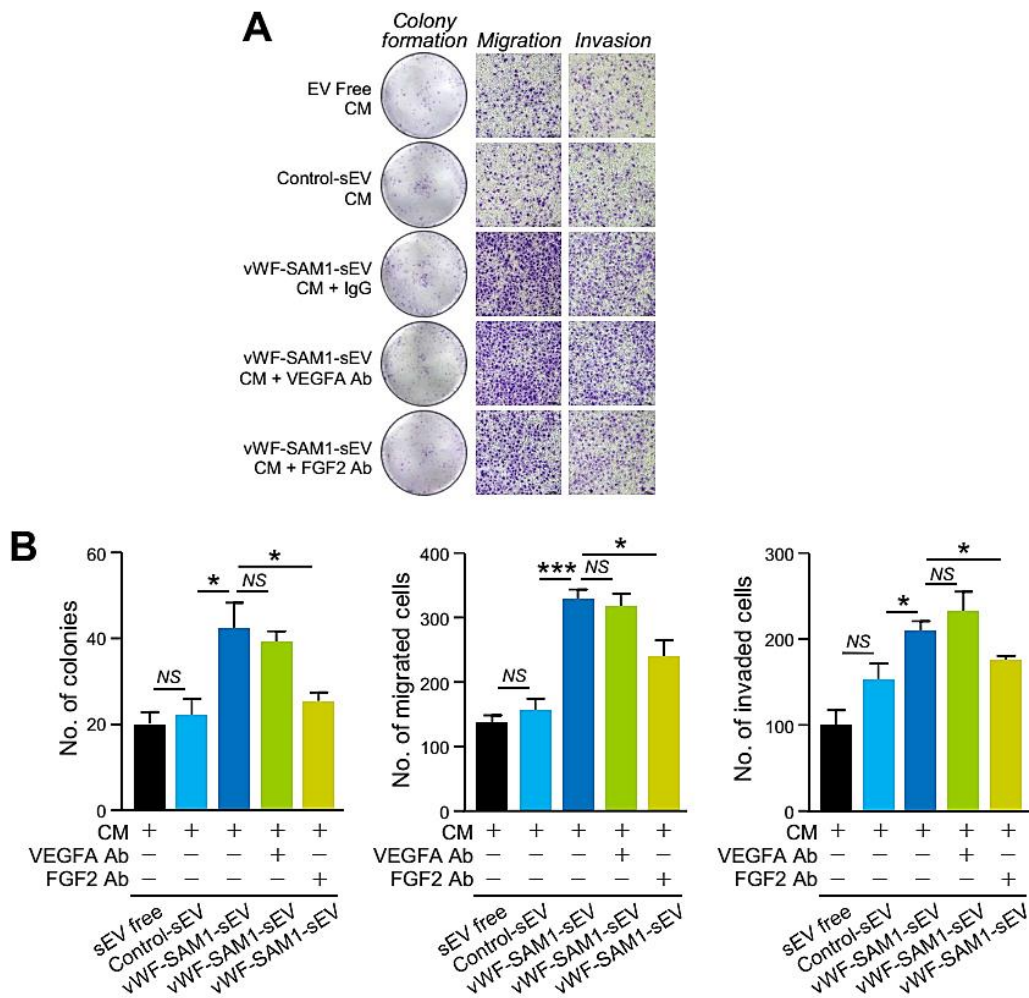

**Supplementary Figure 4. Anti-VEGFA and anti-FGF2 antibodies inhibit sEV-vWF-induced cell growth and motility.** A. Representative images of colony formation, migration and invasion assays of Huh7 after incubation with conditioned medium of HUVEC pre-treated with sEV in the presence of anti-VEGFA or anti-FGF2 antibodies. B. Calculated number of colonies, migrated cells and invaded cells. Data are presented as mean  $\pm$  SEM. \* $P < 0.05$ ; \*\*\* $P < 0.001$ .  $P < 0.05$  is regarded as statistically significant. NS, not significant.



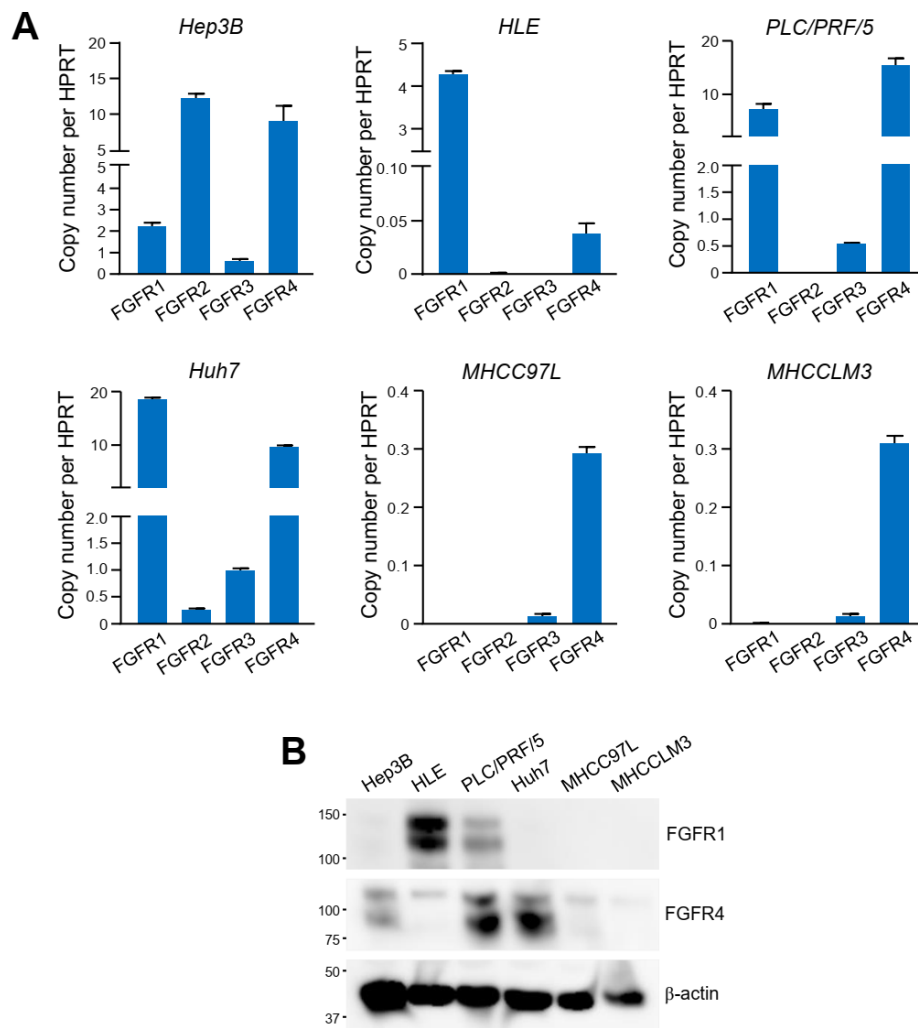

**Supplementary Figure 5. Expression of FGFR in HCC cell lines. A.** Quantitative PCR of FGF receptors in cell line, Hep3B, HLE, Huh7, PLC/PRF/5, MHCC97L and MHCCLM3. **B.** Expression of FGFR1 and FGFR4 in HCC cell lines was analyzed by immunoblotting.

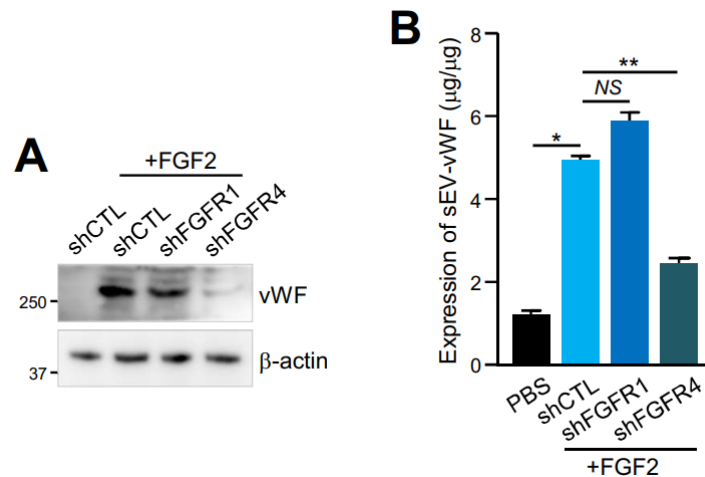

**Supplementary Figure 6. FGF2 induces cellular level of vWF and release of sEV-vWF by HCC cells.** **A.** PLC/PRF/5 non-target control, FGFR1 and FGFR4 knockdown cells treated with FGF2 recombinant protein were examined for vWF expression by western blot analysis. **B.** Conditioned medium of PLC/PRF/5 non-target control, FGFR1 and FGFR4 knockdown cells treated with FGF2 recombinant protein were collected for sEV isolation. The level of vWF of isolated sEV was analysed by ELISA. Data are presented as mean  $\pm$  SEM. \* $P < 0.05$ ; \*\* $P < 0.01$ .  $P < 0.05$  is regarded as statistically significant. NS, not significant.



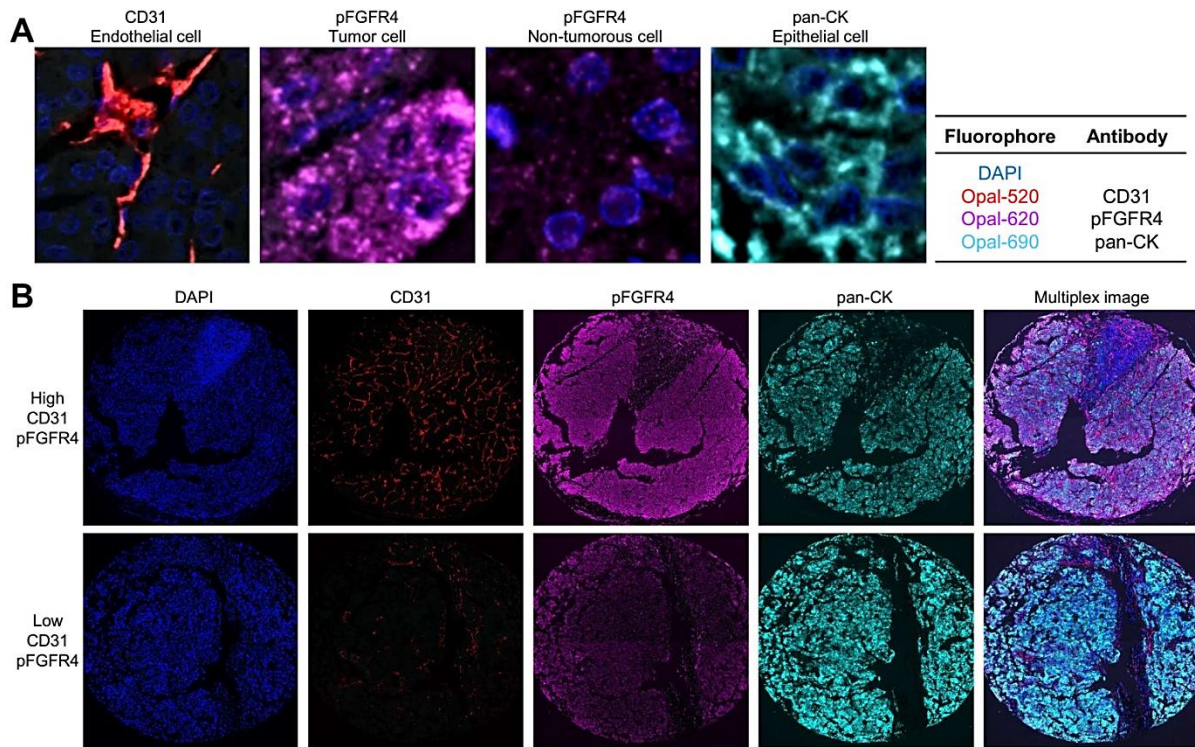

**Supplementary Figure 7. Correlation between CD31 and pFGFR4 was analysed by 4-color multiplex fluorescent immunohistochemistry. A.** Images were scanned and analysed by Vectra Polaris system and inform software, respectively. Representative images for cell phenotyping. Endothelial cell was defined by CD31, epithelial cell was defined by pan-cytokeratin (pan-CK), and tumour cell was defined by the size of nuclear DAPI signal. **B.** Representative single colour images and merge image of DAPI, CD31, pFGFR4 and pan-CK staining of HCC core with high intensity of both CD31 and pFGFR4 (*upper panel*) and of HCC core with low intensity of both CD31 and pFGFR4 (*lower panel*).

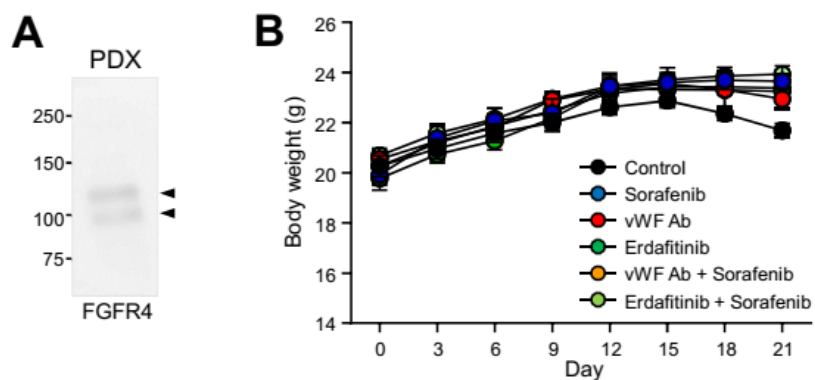

**Supplementary Figure 8. Patient-derived xenograft mouse model. A.** Western blotting of FGFR4 expression in HCC patient-derived xenograft (PDX). **B.** Body weight of mice was examined every 3 days till the experimental endpoint. Data was plotted against time.

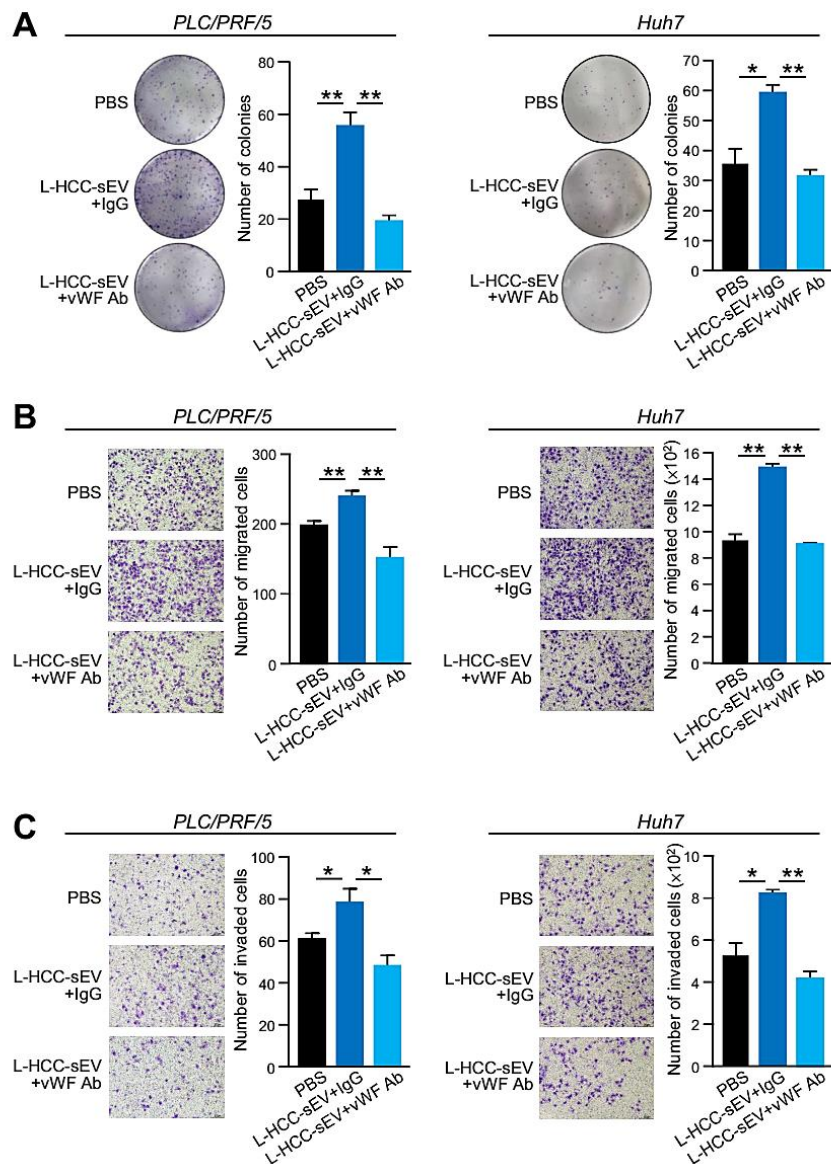

**Supplementary Figure 9. Anti-vWF antibody inhibits promotion of cell growth and motility induced by HCC patient circulating sEV.** PLC/PRF/5 (*left*) and Huh7 (*right*) cells were incubated with L-HCC-sEV in the presence of control IgG or anti-vWF antibody. The treated cells were subjected to colony formation (**A**), migration (**B**) and invasion assays (**C**). The number of colonies and cells were counted. Data are presented as mean  $\pm$  SEM. \* $P < 0.05$ ; \*\* $P < 0.01$ .  $P < 0.05$  is regarded as statistically significant.

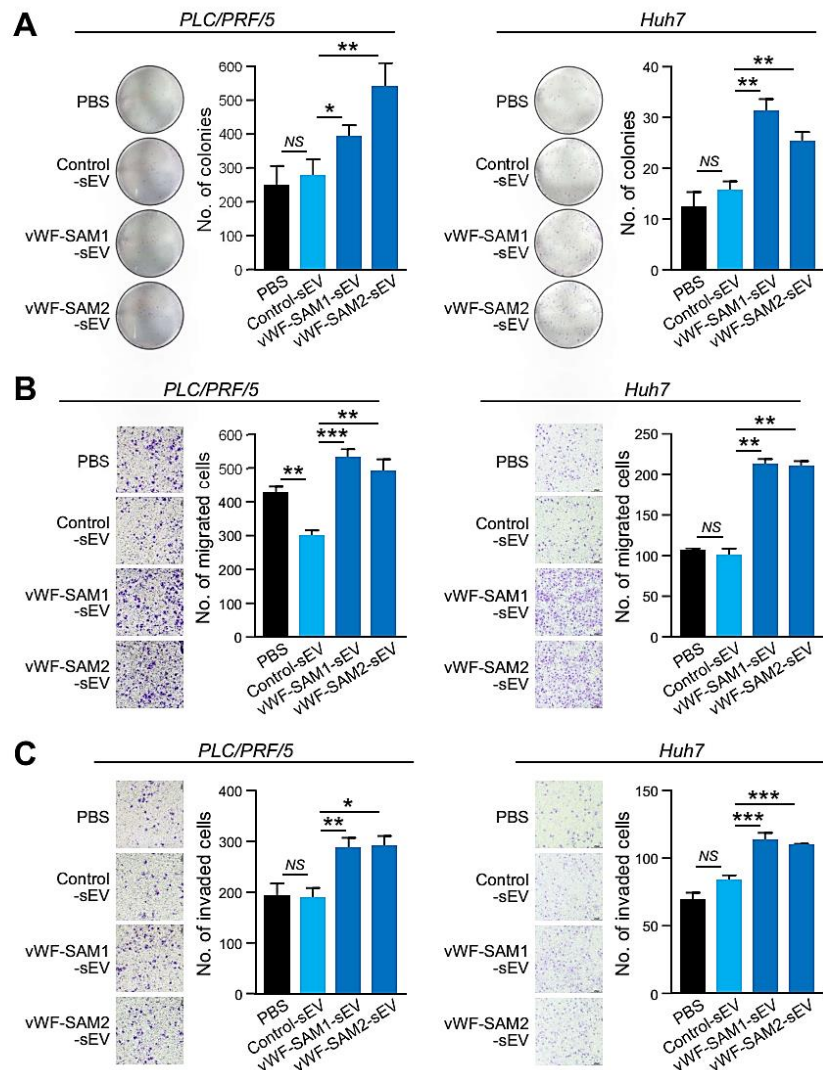

**Supplementary Figure 10. vWF-enhanced sEV promotes HCC cell growth and motility.** PLC/PRF/5 (*left*) and Huh7 (*right*) cells were incubated with either control- or vWF-SAM-sEV. The treated cells were subjected to colony formation (**A**), migration (**B**) and invasion assays (**C**). The number of colonies and cells were counted. Data are presented as mean  $\pm$  SEM. \* $P < 0.05$ ; \*\* $P < 0.01$ , \*\*\* $P < 0.001$ .  $P < 0.05$  is regarded as statistically significant. *NS*, not significant.

**Supplementary Table 1. Expression of top 10 upregulated proteins of L-HCC-sEV compared to Normal-sEV obtained from mass spectrometry**

| Protein name | Mean reading |                |            |              | *Fold change |
|--------------|--------------|----------------|------------|--------------|--------------|
|              | Normal -sEV  | Cirrhosis -sEV | E-HCC -sEV | L-HCC -sEV   |              |
| IGHG1        | 161615066    | 90637574       | 357403449  | 31708545878  | 196.20       |
| pIgR         | 49684579     | 54326437       | 35880628   | 919979586    | 18.52        |
| IGHG3        | 112067585    | 416131101      | 306112703  | 1166513546   | 10.41        |
| LGALS3BP     | 160560131    | 260269348      | 866534284  | 1636105017   | 10.19        |
| IGLC6        | 4282351576   | 2852252410     | 194968292  | 41784975114  | 9.76         |
| CP           | 115631870    | 170259741      | 88250031   | 903849835    | 7.82         |
| vWF          | 293994940    | 219845011      | 418807349  | 1607454220   | 5.47         |
| IGHA1        | 39919473291  | 45559991712    | 1057699032 | 209285035471 | 5.24         |
| IGHV5-51     | 79167396     | 52325940       | 21096189   | 325359719    | 4.11         |
| SERPINA1     | 208504499    | 168769913      | 74570119   | 421509339    | 2.02         |

\* Comparison between L-HCC-sEV and Normal-sEV

Supplementary Table 2. Information of serum donors

|                                                             | Clinical parameters | Category      | Number of donors |
|-------------------------------------------------------------|---------------------|---------------|------------------|
| <b>HCC patients</b>                                         | Gender              | Male          | 45               |
|                                                             |                     | Female        | 10               |
|                                                             | Age                 | < 50          | 17               |
|                                                             |                     | 50 - 60       | 17               |
|                                                             |                     | > 60          | 21               |
|                                                             | HBsAg               | Positive      | 35               |
|                                                             |                     | Negative      | 20               |
|                                                             | Cirrhotic liver     | Cirrhosis     | 25               |
|                                                             |                     | Normal and CH | 30               |
| pTNM stage                                                  | I and II            | 37            |                  |
|                                                             | III and IV          | 18            |                  |
|                                                             | Clinical parameters | Category      | Number of donors |
| <b>Individuals with chronic HBV infection and cirrhosis</b> | Gender              | Male          | 28               |
|                                                             |                     | Female        | 0                |
|                                                             | Age                 | < 50          | 7                |
|                                                             |                     | 50 - 60       | 2                |
|                                                             |                     | > 60          | 19               |
|                                                             | Clinical parameters | Category      | Number of donors |
| <b>Control individuals</b>                                  | Gender              | Male          | 9                |
|                                                             |                     | Female        | 9                |
|                                                             | Age                 | < 50          | 4                |
|                                                             |                     | 50 - 60       | 8                |
|                                                             |                     | > 60          | 6                |

HBsAg, Hepatitis B surface antigen; CH, Chronic hepatitis; pTNM = Pathological tumour-node-metastasis

**Supplementary Table 3. Oligonucleotides used in the study**

| Name of oligos     | Sequence 5' to 3'         |
|--------------------|---------------------------|
| VWF-qF             | CCGATGCAGCCTTTTCGGA       |
| VWF-qR             | TCCCCAAGATACACGGAGAGG     |
| vWF-SAM-1F         | CACCGAAGTGTGGGGGTGTAGGGAT |
| vWF-SAM-1R         | AAACATCCCTACACCCCCACACTTC |
| vWF-SAM-2F         | CACCGAGTTAATTAAGGCAGCTGCC |
| vWF-SAM-2R         | AAACGGCAGCTGCCTTAATTAACTC |
| VEGFA-qF           | AGGGCAGAATCATCACGAAGT     |
| VEGFA-qR           | AGGGTCTCGATTGGATGGCA      |
| IL-8-qF            | TTTTGCCAAGGAGTGCTAAAGA    |
| IL-8-qR            | AACCCTCTGCACCCAGTTTTTC    |
| MMP2-qF            | TACAGGATCATTGGCTACACACC   |
| MMP2-qR            | GGTCACATCGCTCCAGACT       |
| FGF2-qF            | AGAAGAGCGACCCTCACATCA     |
| FGF2-qR            | CGGTTAGCACACACTCCTTTG     |
| HIF-1 $\alpha$ -qF | GAACGTCGAAAAGAAAAGTCTCG   |
| HIF-1 $\alpha$ -qR | CCTTATCAAGATGCGAACTCACA   |
| Angiopoietin-1-qF  | AGTGGACACTGGACATTGCAG     |
| Angiopoietin-1-qR  | GCTTCCTCTTTACCATCTGTGG    |
| Angiogenin-1-qF    | CTGGGCGTTTTGTGTGGTC       |
| Angiogenin-1-qR    | GGTTTGGCATCATAGTGCTGG     |
| NOS3-qF            | TGATGGCGAAGCGAGTGAAG      |
| NOS3-qR            | ACTCATCCATACACAGGACCC     |
| HPRT1-qF           | CAGCCATGAGAAGTGGTTCTGT    |
| HPRT1-qR           | CACTGATGAAGCACAGCCCTTA    |
| FGFR1-qF           | CCCGTAGCTCCATATTGGACA     |
| FGFR1-qR           | TTTGCCATTTTTCAACCAGCG     |
| FGFR2-qF           | AGCACCATACTGGACCAACAC     |
| FGFR2-qR           | GGCAGCGAAACTTGACAGTG      |
| FGFR3-qF           | TGCGTCGTGGAGAACAAGTTT     |
| FGFR3-qR           | GCACGGTAACGTAGGGTGTG      |
| FGFR4-qF           | GAGGGGCCGCCTAGAGATT       |
| FGFR4-qR           | CAGGACGATCATGGAGCCT       |



|             |                                                                 |
|-------------|-----------------------------------------------------------------|
| FGFR1-KD-1F | CCGGCAGAGGAGAAAGAAACAGATACTCGAGTAT<br>CTGTTTCTTTCTCCTCTGTTTTTG  |
| FGFR1-KD-1R | AATTCAAAAACAGAGGAGAAAGAAACAGATACTC<br>GAGTATCTGTTTCTTTCTCCTCTG  |
| FGFR1-KD-2F | CCGGCCCTCCCAGATGTTGGACCAACTCGAGTTGG<br>TCCAACATCTGGGAGGGTTTTTG  |
| FGFR1-KD-2R | AATTCAAAAACCCTCCCAGATGTTGGACCAACTCG<br>AGTTGGTCCAACATCTGGGAGGG  |
| FGFR4-KD-1F | CCGGGCTGGAGAGCTGCTATGCTAACTCGAGTTAG<br>CATAGCAGCTCTCCAGCTTTTTTG |
| FGFR4-KD-1R | AATTCAAAAAGCTGGAGAGCTGCTATGCTAACTCG<br>AGTTAGCATAGCAGCTCTCCAGC  |
| FGFR4-KD-2F | CCGGGCCGACACAAGAACATCATCACTCGAGTGA<br>TGATGTTCTTGTGTCGGCTTTTTTG |
| FGFR4-KD-2R | AATTCAAAAAGCCGACACAAGAACATCATCACTC<br>GAGTGATGATGTTCTTGTGTCGGC  |

---
